# Supplementary material for: Light-Induced Thermomechanical Reorientation and Helicity Flipping in Ferroelectric Nematic Phase
Source: Research Square preprint supplement (doi:10.21203/rs.3.rs-6211938/v1), 2025-03-17
Supplement: Supplementary file 1 [file 1d9abe72df5940cdc2a9989f.docx]

Description of Additional Supplementary Files

**Movies**

**File Name**: Supplementary Movie 1

**Description**: Nucleation and growth of oppositely twisted NF domains in APR cell when a *P*=90 mW laser line parallel with rubbing direction **R** is switched off. The counter on top left shows the time elapsed from the beginning of the illumination.

**File Name**: Supplementary Movie 2

**Description**: Pattern evolution induced by a *P*=4.5 mW Gaussian laser beam in PR cell (rubbing direction, **R**, points upward). The movie is recorded in double speed, while the the counter on top-left shows the real-time elapsed from the beginning of the illumination.

**File Name**: Supplementary Movie 3

**Description**: Pattern evolution induced by a *P*=1.8 mW Gaussian laser beam in APR cell (rubbing directions vertical). The movie is recorded at double speed, while the counter on the top-left corner shows the real-time elapsed from the beginning of the illumination.

**File Name**: Supplementary Movie 4

**Description**: Pattern evolution induced by switching off a *P*=0.54 mW Gaussian laser beam in APR cell (rubbing directions vertical). Before the movie, the sample was illuminated for more than 5 hours without nucleation of oppositely handed NF domains. The counter at the bottom-left corner is set to 0 when the laser beam is switched off.

**File Name**: Supplementary Movie 5

**Description**: Demonstration of the fast deformation changes when the laser line is switched off and on. Geometry: APR cell, laser line perpendicular to the rubbing direction, light-induced deformation already developed at the start of the real-time movie.
